# Supplementary material for: Synthesis of a new class of naphthoquinone glycoconjugates and evaluation of their potential as antitumoral agents
Source: Royal Society of Chemistry journal article supplement (doi:10.1039/c5ra19192k), 2015-01-01
Supplement: c5ra19192k1.pdf [file c5ra19192k1.pdf]

## Synthesis of a new class of naphthoquinone glycoconjugates and evaluation of their potential as antitumoral agents

Vinicius R. Campos<sup>a</sup>, Anna C. Cunha<sup>a\*</sup>, Wanderson A. Silva<sup>a</sup>, Vitor F. Ferreira<sup>a</sup>, Carla Santos de Sousa<sup>b</sup>, Patrícia D. Fernandes<sup>b</sup>, Vinícius N. Moreira<sup>a</sup>, David R. da Rocha<sup>a</sup>, Flaviana R. F. Dias<sup>a</sup>, Raquel C. Montenegro<sup>c</sup>, Maria C. B. V. de Souza<sup>a</sup>, Fernanda da C. S. Boechat<sup>a</sup>, Caroline F. J. Franco<sup>a</sup> and Jackson A. L. C. Resende<sup>d</sup>

<sup>a</sup>*Universidade Federal Fluminense, Departamento de Química Orgânica, Programa de Pós-Graduação em Química, Outeiro de São João Batista, 24020-141 Niterói, RJ, Brazil*

<sup>b</sup>*Universidade Federal do Rio de Janeiro, Instituto de Ciências Biomédicas, Laboratório de Farmacologia da Dor e da Inflamação. CCS, Bloco J, sala 10. Cidade Universitária, RJ, Brazil*

<sup>c</sup>*Universidade Federal do Pará, Instituto de Ciências Biológicas, Belém, PA, Brazil*

<sup>d</sup>*Universidade Federal Fluminense, Departamento de Química Inorgânica, Laboratório Regional de Difração de Raios X (LDRX), 24020-141, Niterói, RJ, Brazil*

## Supporting Information

### Index

|                                                                                                         |   |
|---------------------------------------------------------------------------------------------------------|---|
| <sup>1</sup> H NMR spectrum of derivative <b>9a</b> (CDCl <sub>3</sub> , 500 MHz).....                  | 3 |
| Expansion of the <sup>1</sup> H NMR spectrum of derivative <b>9a</b> (CDCl <sub>3</sub> , 500 MHz)..... | 4 |
| Expansion of the <sup>1</sup> H NMR spectrum of derivative <b>9a</b> (CDCl <sub>3</sub> , 500 MHz)..... | 5 |
| <sup>13</sup> C / APT NMR spectrum of derivative <b>9a</b> (CDCl <sub>3</sub> , 125 MHz).....           | 6 |
| <sup>1</sup> H NMR spectrum of derivative <b>9b</b> (CDCl <sub>3</sub> , 300 MHz).....                  | 7 |
| Expansion of the <sup>1</sup> H NMR spectrum of derivative <b>9b</b> (CDCl <sub>3</sub> , 300 MHz)..... | 8 |
| Expansion of the <sup>1</sup> H NMR spectrum of derivative <b>9b</b> (CDCl <sub>3</sub> , 300 MHz)..... | 9 |

|                                                                                                       |    |
|-------------------------------------------------------------------------------------------------------|----|
| $^{13}\text{C}$ / APT NMR spectrum of derivative <b>9b</b> ( $\text{CDCl}_3$ , 75 MHz).....           | 10 |
| $^1\text{H}$ NMR spectrum of derivative <b>9c</b> ( $\text{CDCl}_3$ , 500 MHz).....                   | 11 |
| Expansion of the $^1\text{H}$ NMR spectrum of derivative <b>9c</b> ( $\text{CDCl}_3$ , 500 MHz).....  | 12 |
| Expansion of the $^1\text{H}$ NMR spectrum of derivative <b>9c</b> ( $\text{CDCl}_3$ , 500 MHz).....  | 13 |
| $^{13}\text{C}$ / APT NMR spectrum of derivative <b>9c</b> ( $\text{CDCl}_3$ , 125 MHz).....          | 14 |
| $^1\text{H}$ NMR spectrum of derivative <b>11a</b> ( $\text{CDCl}_3$ , 500 MHz).....                  | 15 |
| Expansion of the $^1\text{H}$ NMR spectrum of derivative <b>11a</b> ( $\text{CDCl}_3$ , 500 MHz)..... | 16 |
| Expansion of the $^1\text{H}$ NMR spectrum of derivative <b>11a</b> ( $\text{CDCl}_3$ , 500 MHz)..... | 17 |
| $^{13}\text{C}$ / APT NMR spectrum of derivative <b>11a</b> ( $\text{CDCl}_3$ , 125 MHz).....         | 18 |
| $^1\text{H}$ NMR spectrum of derivative <b>11b</b> ( $\text{CDCl}_3$ , 300 MHz).....                  | 19 |
| Expansion of the $^1\text{H}$ NMR spectrum of derivative <b>11b</b> ( $\text{CDCl}_3$ , 300 MHz)..... | 20 |
| Expansion of the $^1\text{H}$ NMR spectrum of derivative <b>11b</b> ( $\text{CDCl}_3$ , 300 MHz)..... | 21 |
| $^{13}\text{C}$ / APT NMR spectrum of derivative <b>11b</b> ( $\text{CDCl}_3$ , 75 MHz).....          | 22 |
| $^1\text{H}$ NMR spectrum of derivative <b>22a</b> ( $\text{CDCl}_3$ , 500 MHz).....                  | 23 |
| Expansion of the $^1\text{H}$ NMR spectrum of derivative <b>22a</b> ( $\text{CDCl}_3$ , 500 MHz)..... | 24 |
| Expansion of the $^1\text{H}$ NMR spectrum of derivative <b>22a</b> ( $\text{CDCl}_3$ , 500 MHz)..... | 25 |
| $^{13}\text{C}$ / APT NMR spectrum of derivative <b>22a</b> ( $\text{CDCl}_3$ , 125 MHz).....         | 26 |
| $^1\text{H}$ NMR spectrum of derivative <b>22b</b> ( $\text{CDCl}_3$ , 300 MHz).....                  | 27 |
| Expansion of the $^1\text{H}$ NMR spectrum of derivative <b>22b</b> ( $\text{CDCl}_3$ , 300 MHz)..... | 28 |
| Expansion of the $^1\text{H}$ NMR spectrum of derivative <b>22b</b> ( $\text{CDCl}_3$ , 300 MHz)..... | 29 |
| $^{13}\text{C}$ / APT NMR spectrum of derivative <b>22b</b> ( $\text{CDCl}_3$ , 75 MHz).....          | 30 |

8.346  
8.344  
8.331  
8.329  
8.246  
8.244  
8.231  
8.228  
7.877  
7.874  
7.862  
7.859  
7.847  
7.844  
7.833  
7.830  
7.818  
7.815  
7.803  
7.801  
5.016  
5.008  
5.006  
4.993  
4.865  
4.853  
4.745  
4.731  
4.719  
3.410  
1.435  
1.297

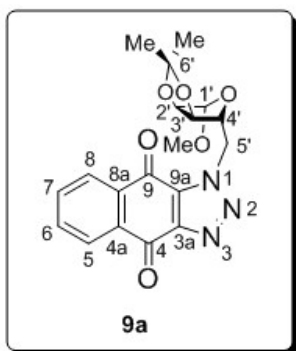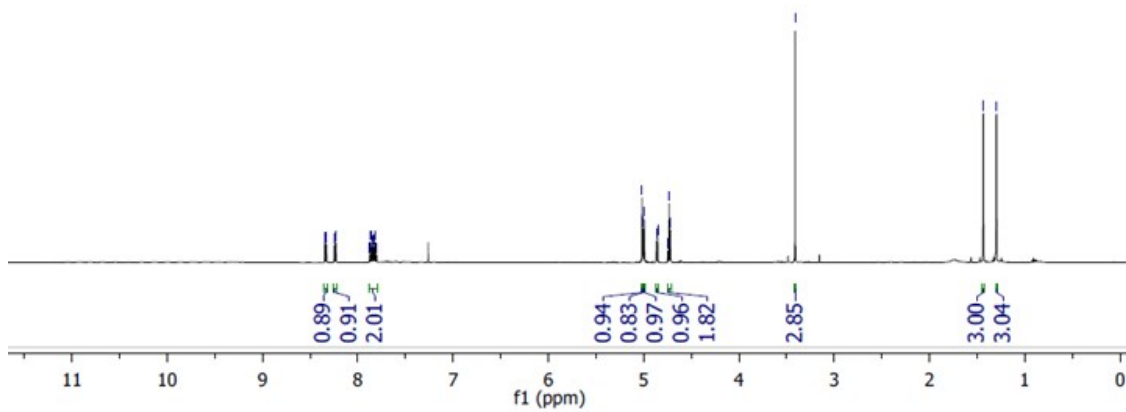

<sup>1</sup>H NMR spectrum of derivative **9a** (CDCl<sub>3</sub>, 500 MHz).

5.016  
5.008  
5.006  
4.993

4.865  
4.853

4.745  
4.731  
4.719

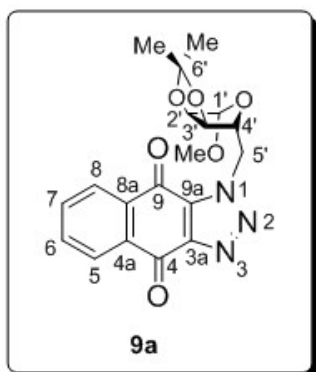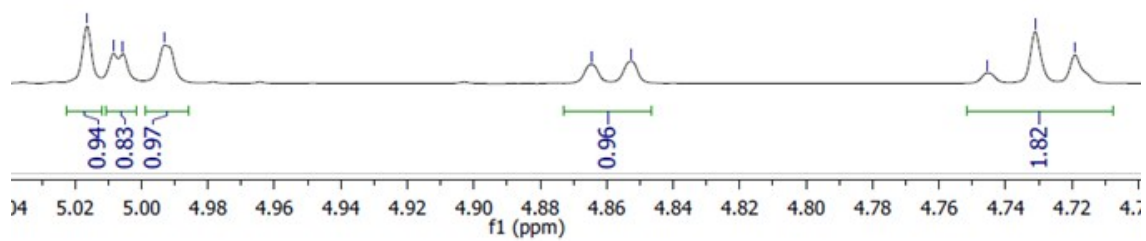

Expansion of the  $^1\text{H}$  NMR spectrum of derivative **9a** ( $\text{CDCl}_3$ , 500 MHz).

8.346  
8.344  
8.331  
8.329

8.246  
8.244  
8.231  
8.228

7.877  
7.874  
7.862  
7.859  
7.847  
7.844  
7.833  
7.830  
7.818  
7.815  
7.803  
7.801

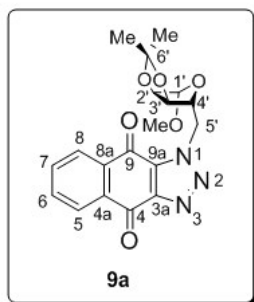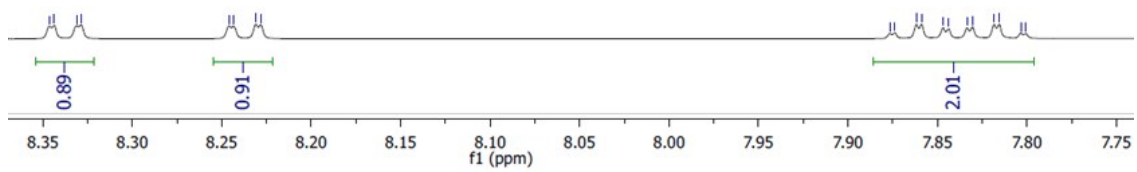

Expansion of the  $^1\text{H}$  NMR spectrum of derivative **9a** ( $\text{CDCl}_3$ , 500 MHz).

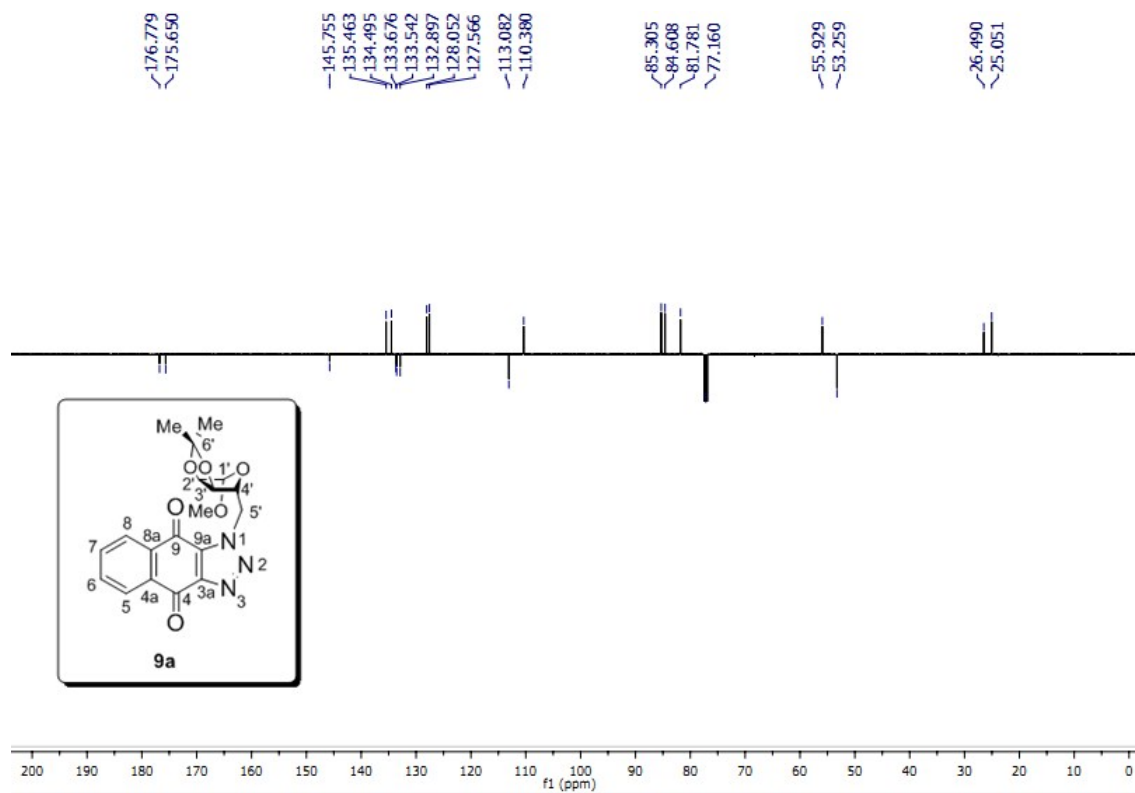

$^{13}\text{C}$  / APT NMR spectrum of derivative **9a** (CDCl<sub>3</sub>, 125 MHz).

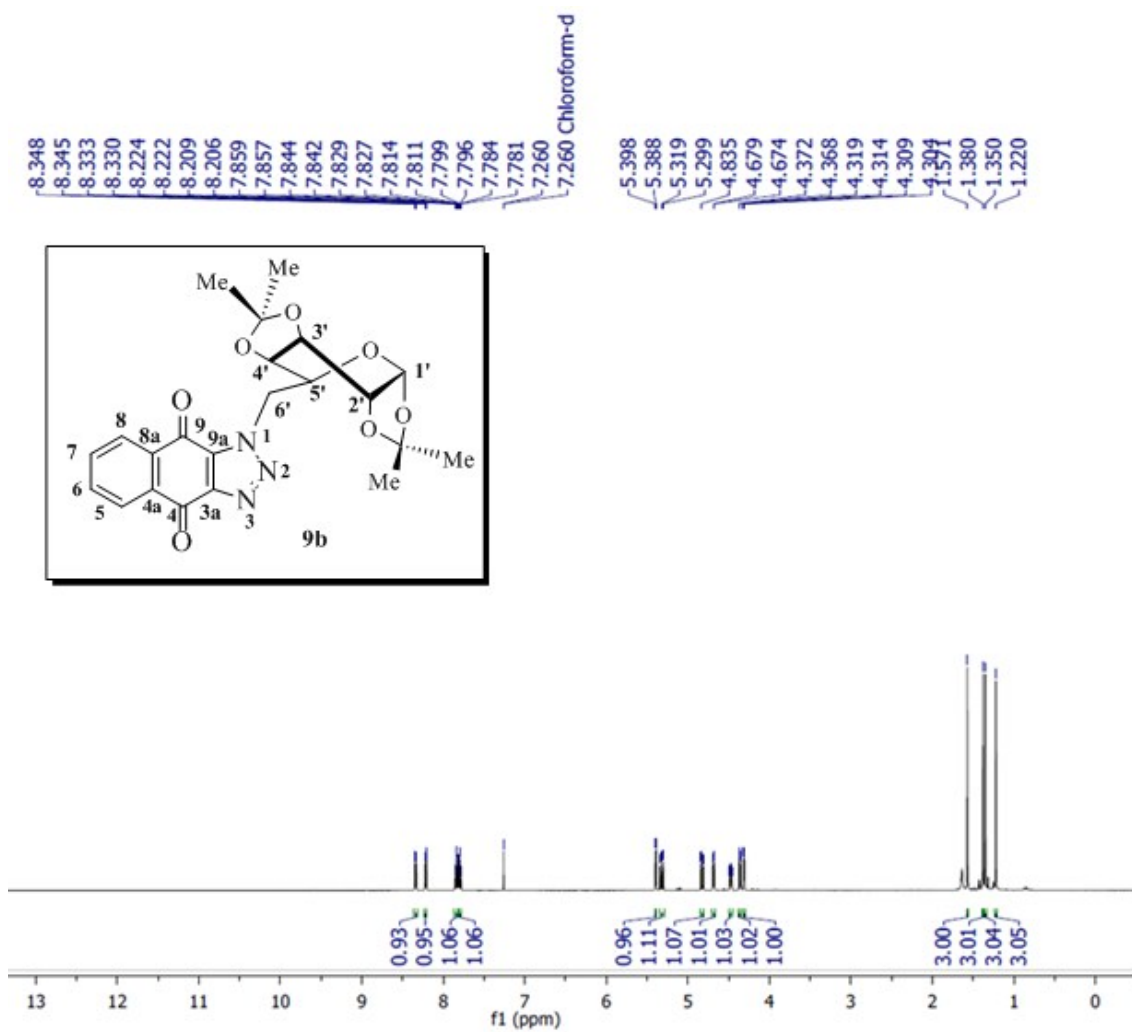

<sup>1</sup>H NMR spectrum of derivative **9b** (CDCl<sub>3</sub>, 300 MHz).

5.398  
5.388  
5.346  
5.327  
5.319  
5.299

4.842  
4.835  
4.814  
4.808

4.695  
4.689  
4.679  
4.674

4.488  
4.484  
4.482  
4.478  
4.469  
4.465  
4.459

4.372  
4.368  
4.356  
4.319  
4.314  
4.309

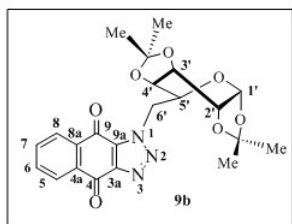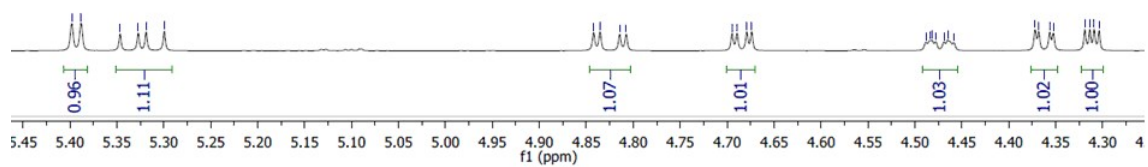

Expansion of the  $^1\text{H}$  NMR spectrum of derivative **9b** ( $\text{CDCl}_3$ , 300 MHz).



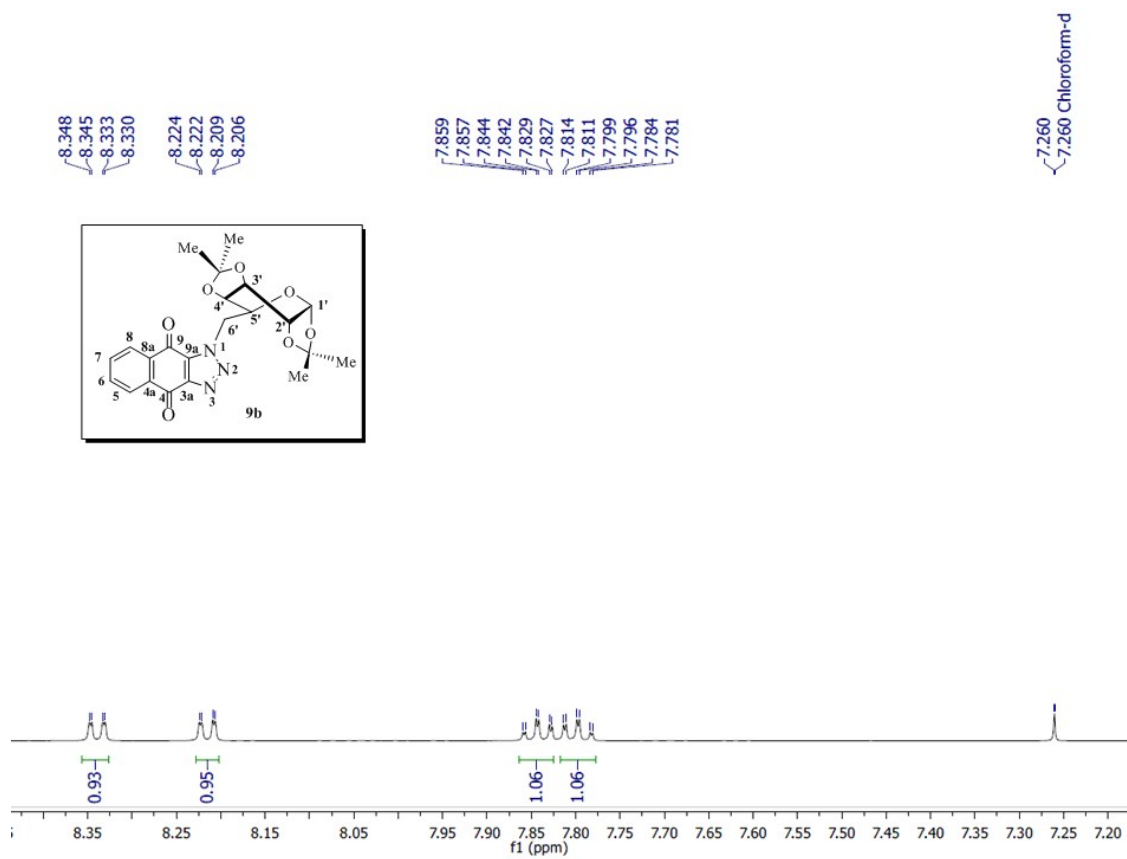

Expansion of the <sup>1</sup>H NMR spectrum of derivative **9b** (CDCl<sub>3</sub>, 300 MHz).

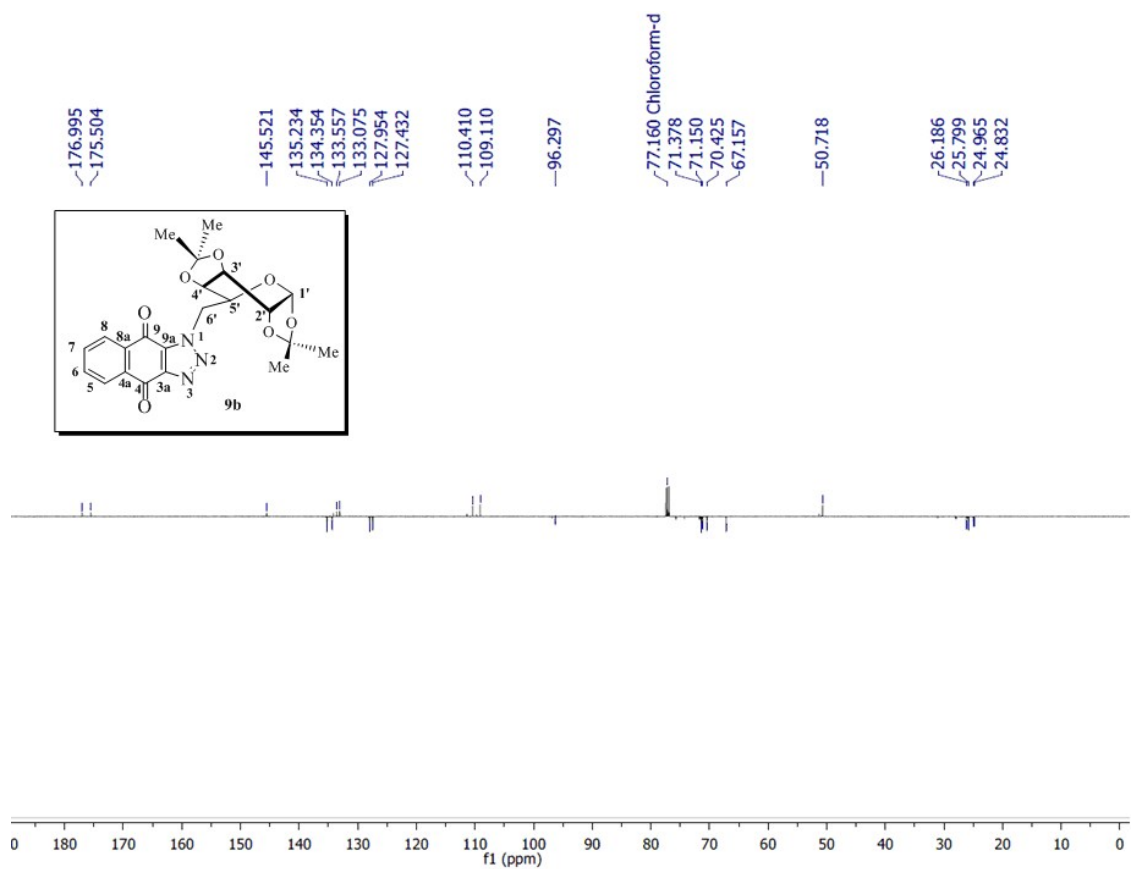

<sup>13</sup>C / APT NMR spectrum of derivative **9b** (CDCl<sub>3</sub>, 75 MHz).

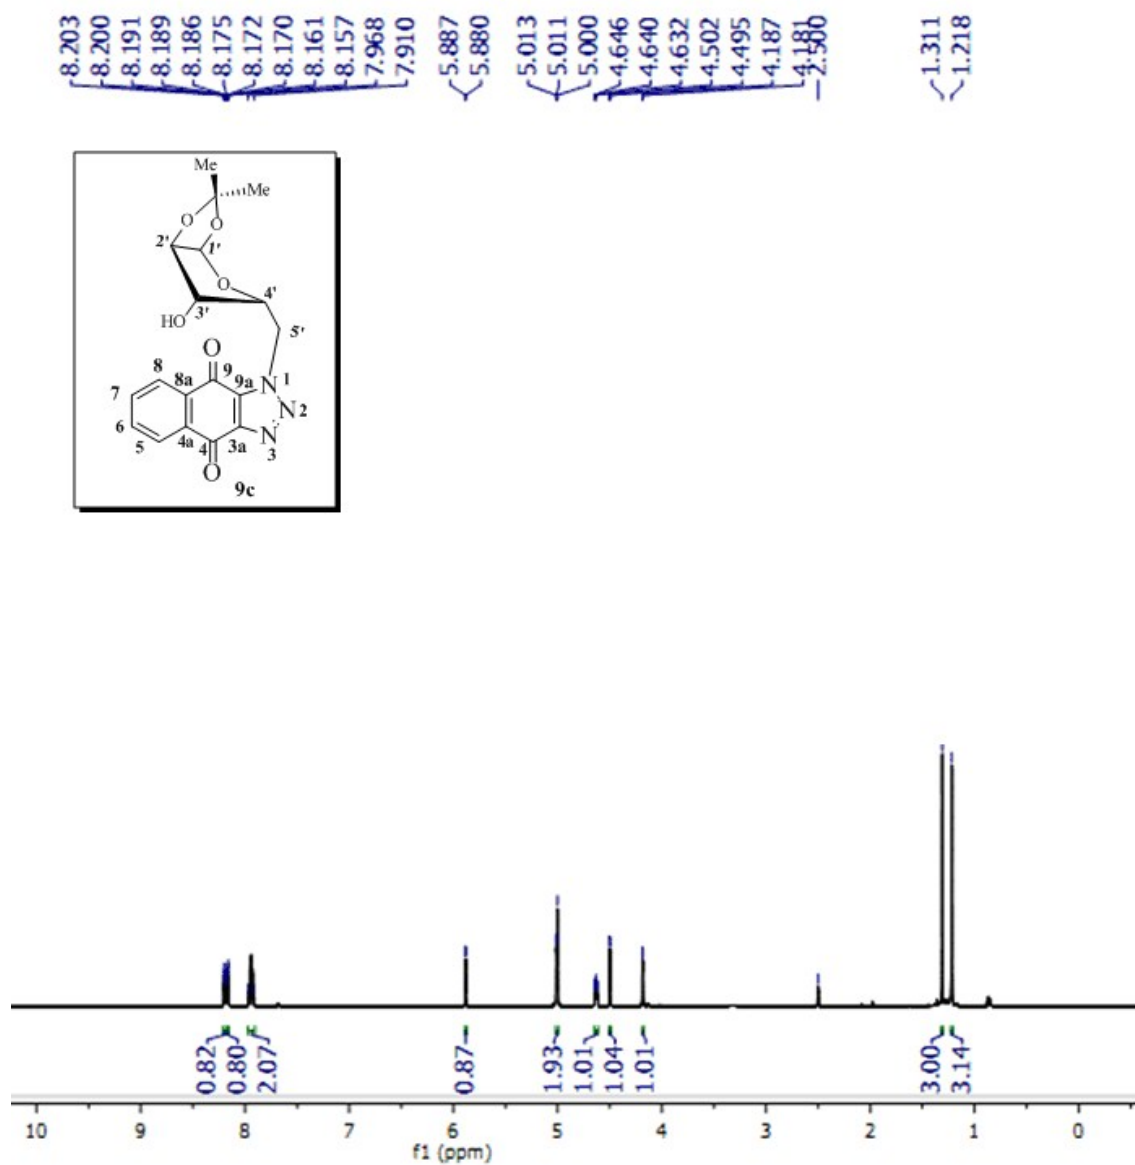

<sup>1</sup>H NMR spectrum of derivative **9c** (CDCl<sub>3</sub>, 500 MHz).

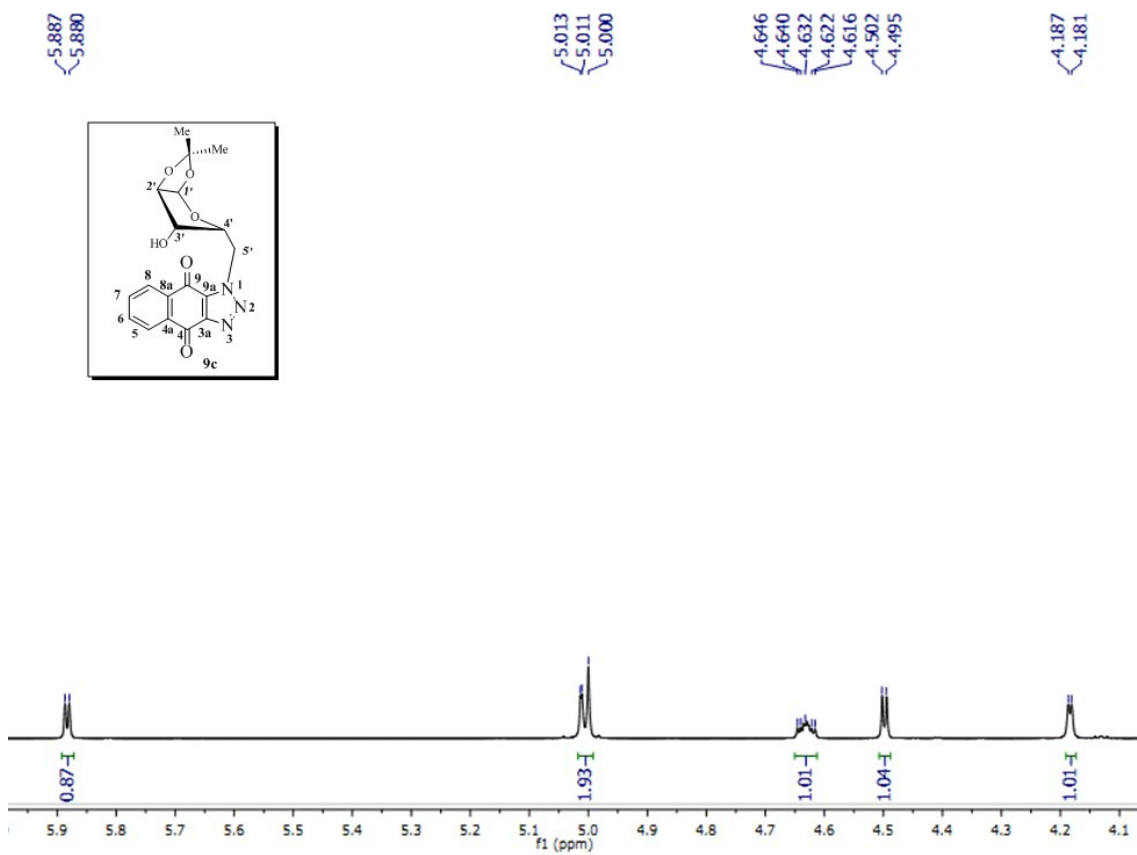

Expansion of the  $^1\text{H}$  NMR spectrum of derivative **9c** ( $\text{CDCl}_3$ , 500 MHz).

8.203  
8.200  
8.191  
8.189  
8.186  
8.175  
8.172  
8.170  
8.161  
8.157

7.968  
7.965  
7.954  
7.950  
7.943  
7.938  
7.928  
7.925  
7.914  
7.910

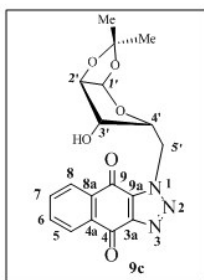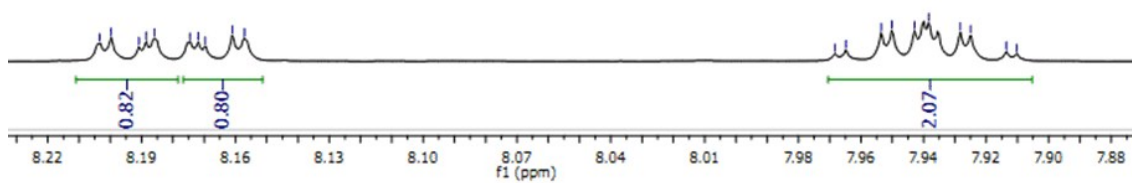

Expansion of the  $^1\text{H}$  NMR spectrum of derivative **9c** ( $\text{CDCl}_3$ , 500 MHz).

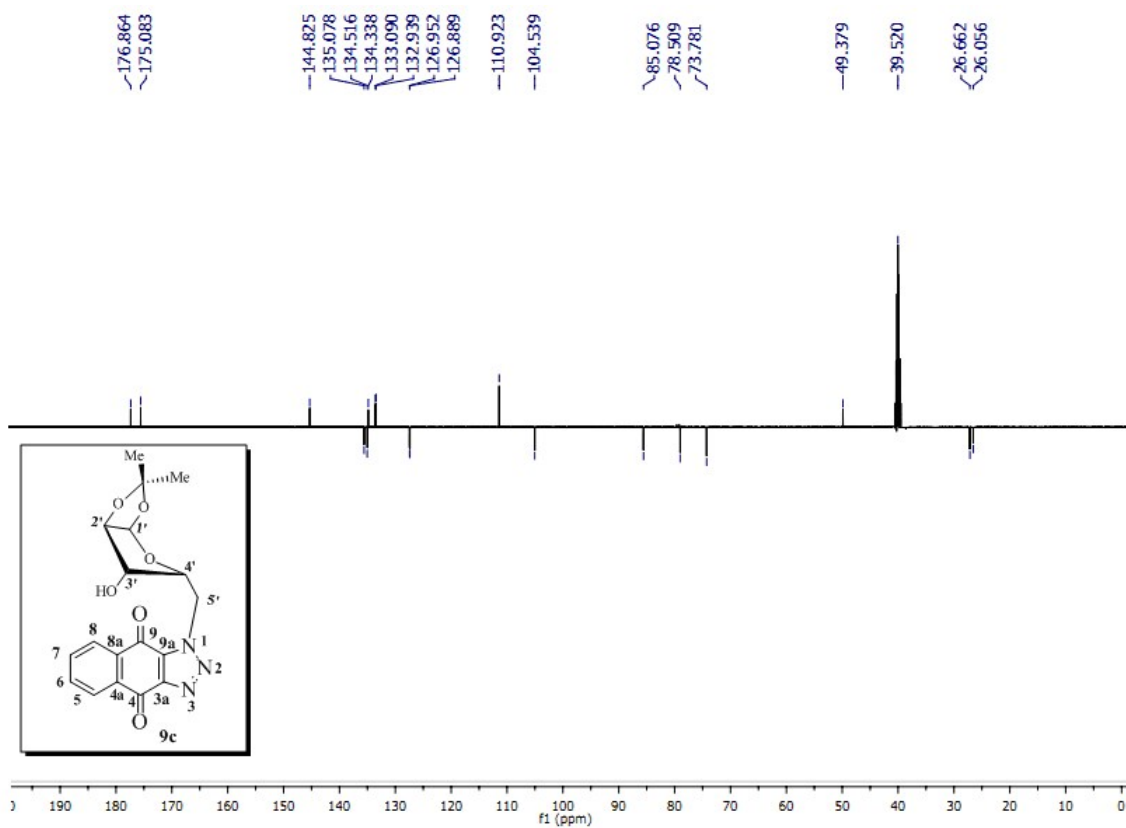

$^{13}\text{C}$  / APT NMR spectrum of derivative **9c** ( $\text{CDCl}_3$ , 125 MHz).

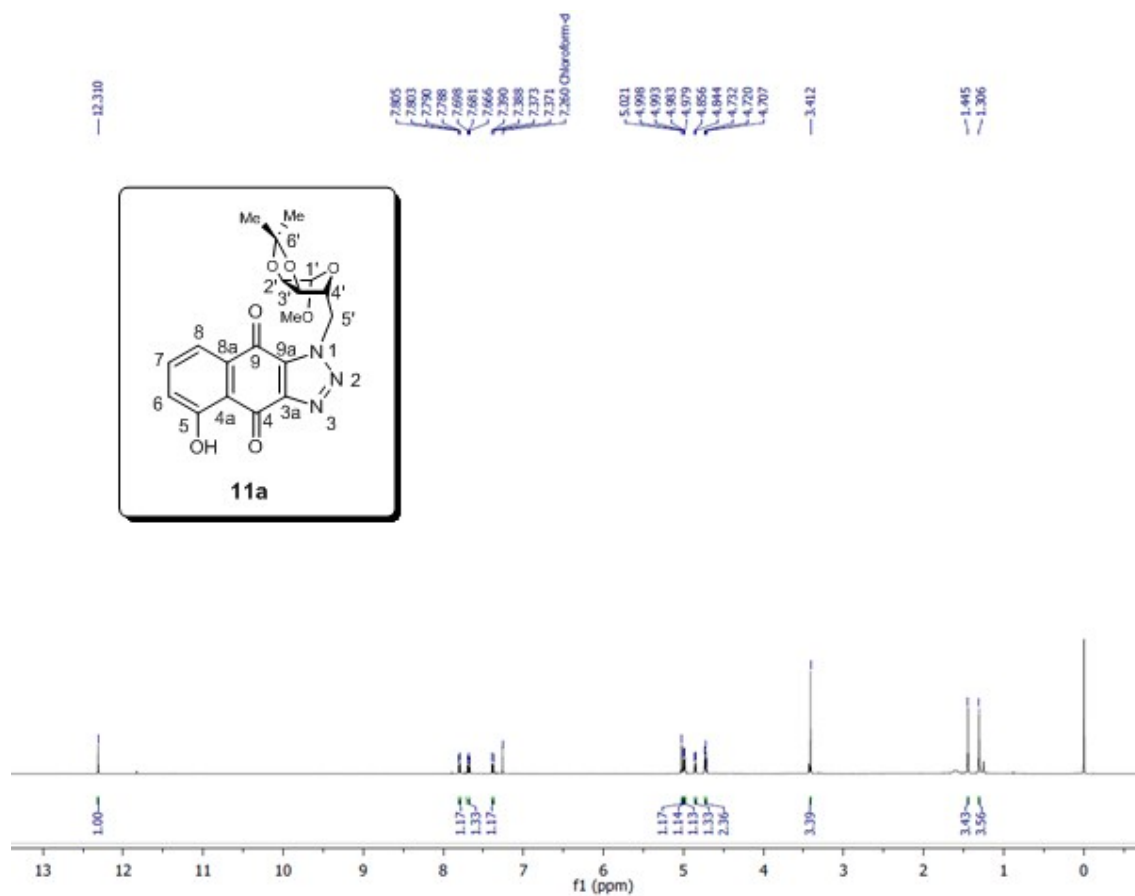

<sup>1</sup>H NMR spectrum of derivative **11a** (CDCl<sub>3</sub>, 500 MHz).

5.021  
4.998  
4.993  
4.983  
4.979

4.856  
4.844

4.732  
4.720  
4.707

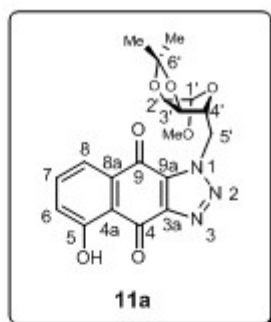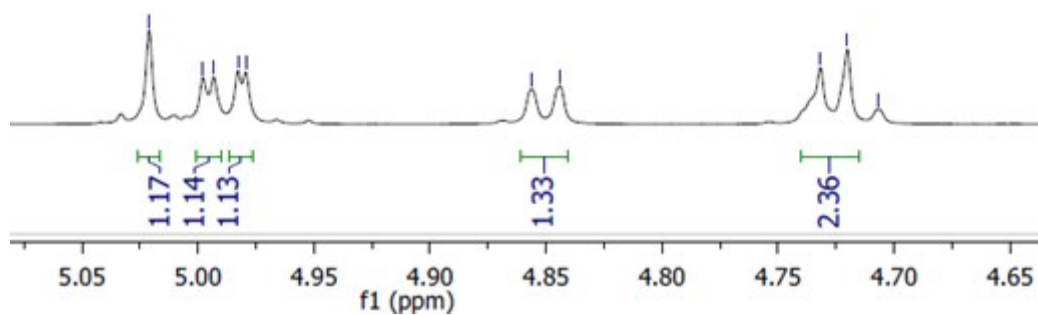

Expansion of the  $^1\text{H}$  NMR spectrum of derivative **11a** ( $\text{CDCl}_3$ , 500 MHz).



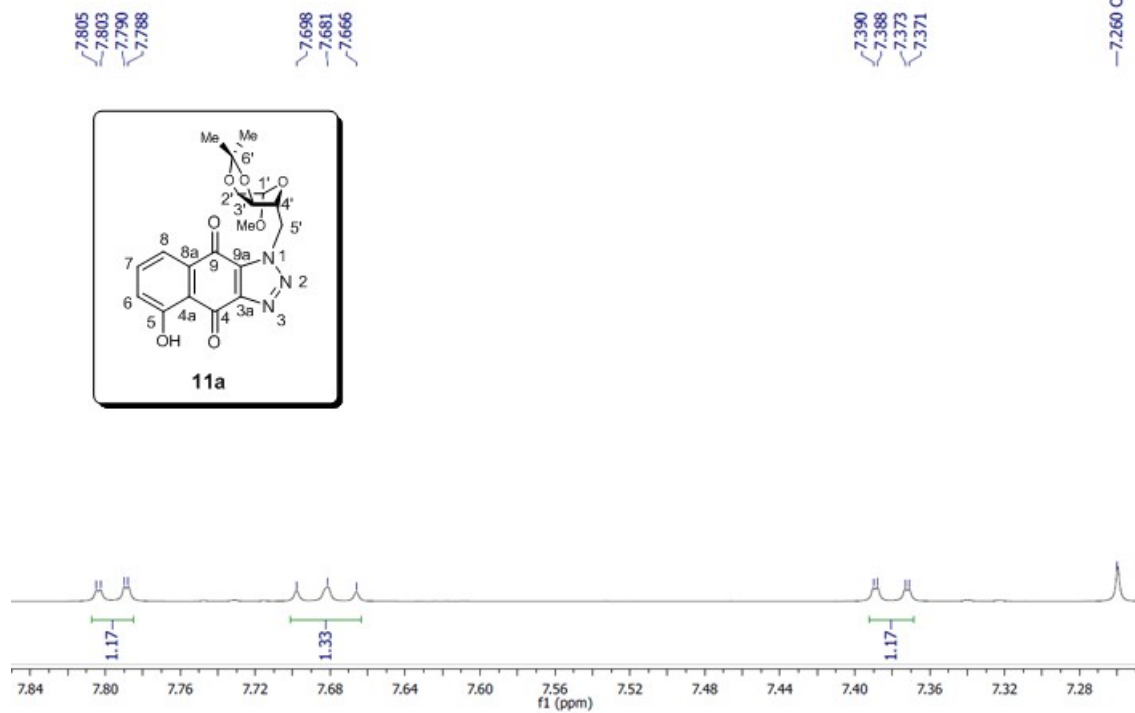

Expansion of the  $^1\text{H}$  NMR spectrum of derivative **11a** (CDCl<sub>3</sub>, 500 MHz).

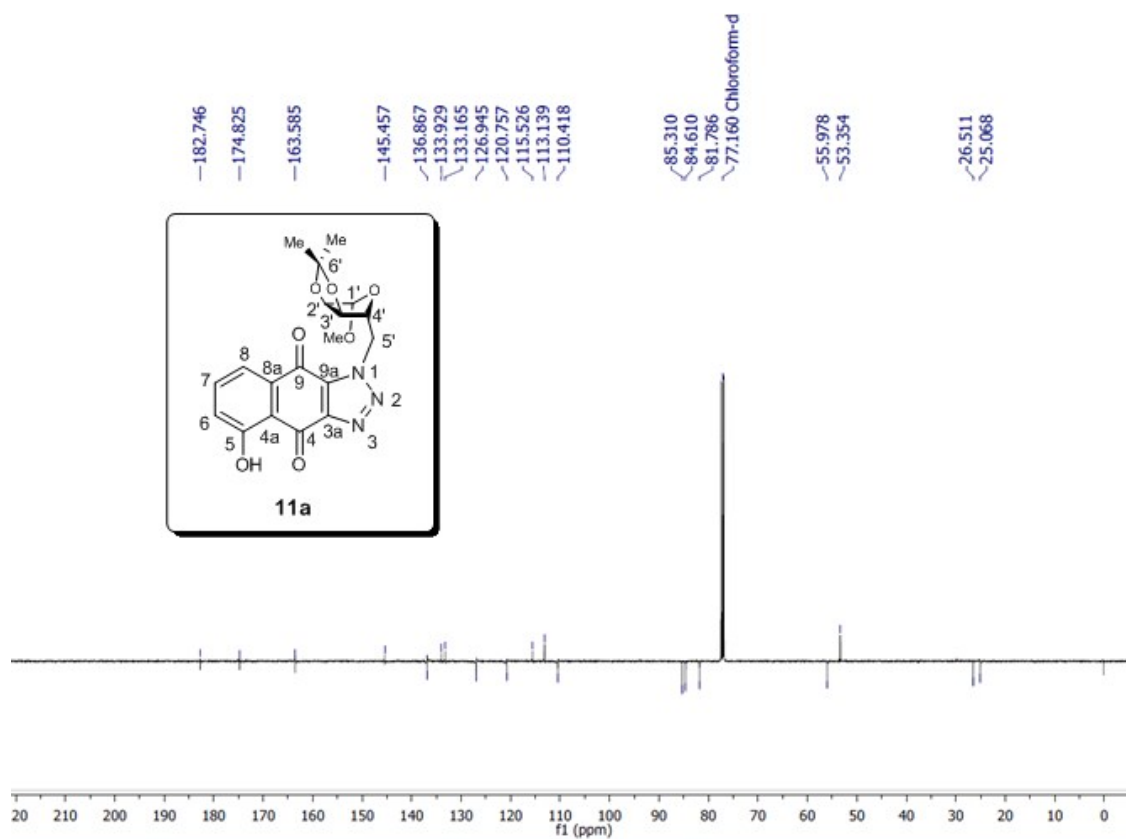

$^{13}\text{C}$  / APT NMR spectrum of derivative **11a** ( $\text{CDCl}_3$ , 125 MHz).

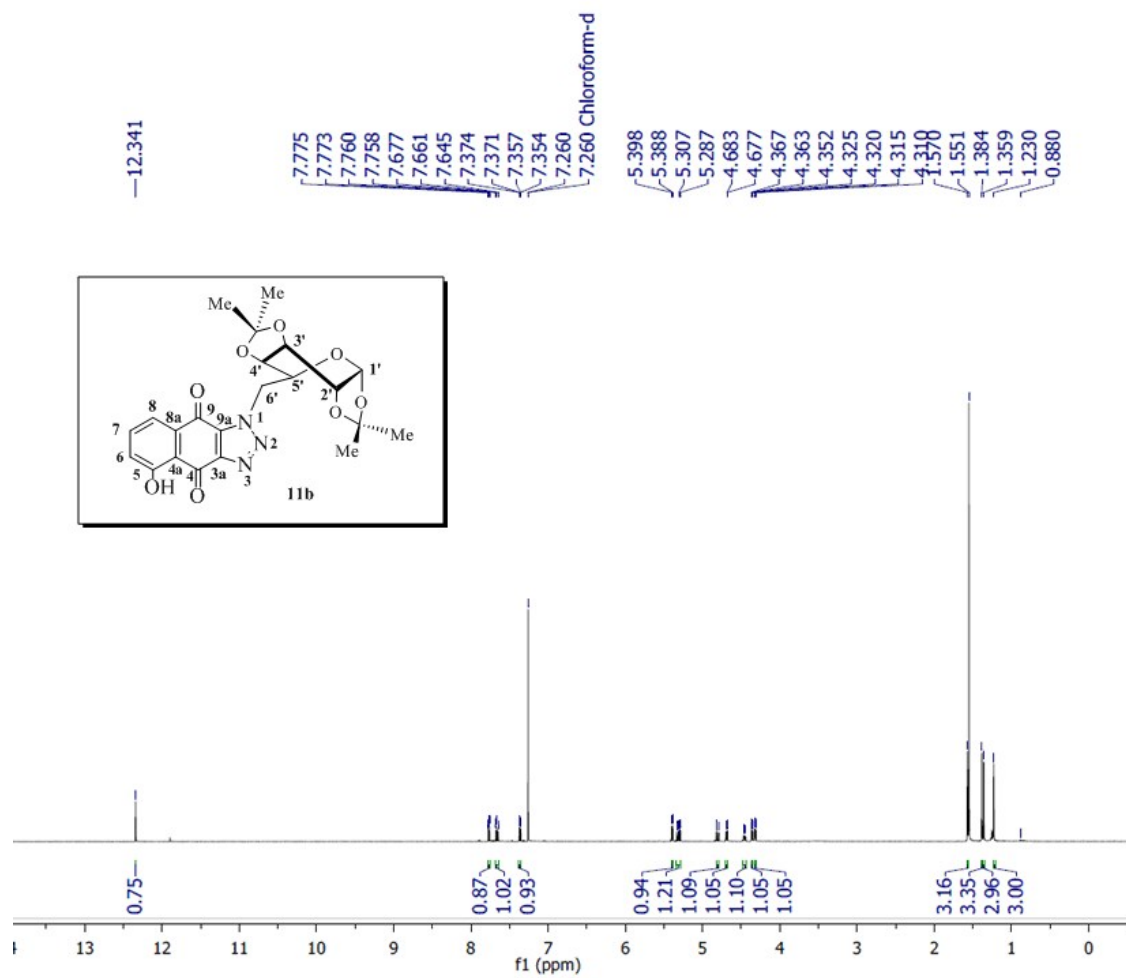

<sup>1</sup>H NMR spectrum of derivative **11b** (CDCl<sub>3</sub>, 300 MHz).

5.398  
5.388  
5.335  
5.315  
5.307  
5.299  
5.287  
4.823  
4.816  
4.795  
4.788  
4.698  
4.693  
4.683  
4.677  
4.465  
4.448  
4.367  
4.363  
4.352  
4.348  
4.325  
4.320  
4.315  
4.310

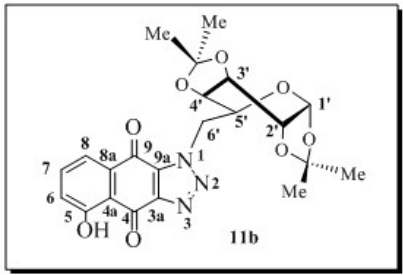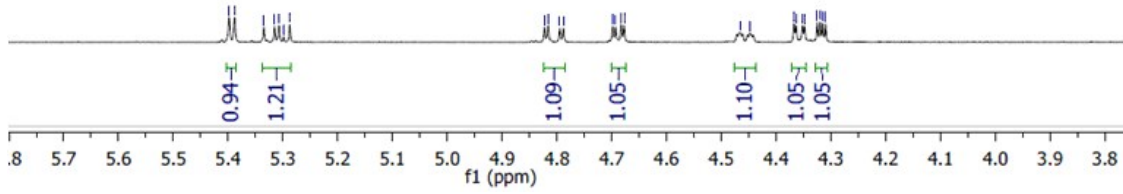

Expansion of the <sup>1</sup>H NMR spectrum of derivative **11b** (CDCl<sub>3</sub>, 300 MHz).

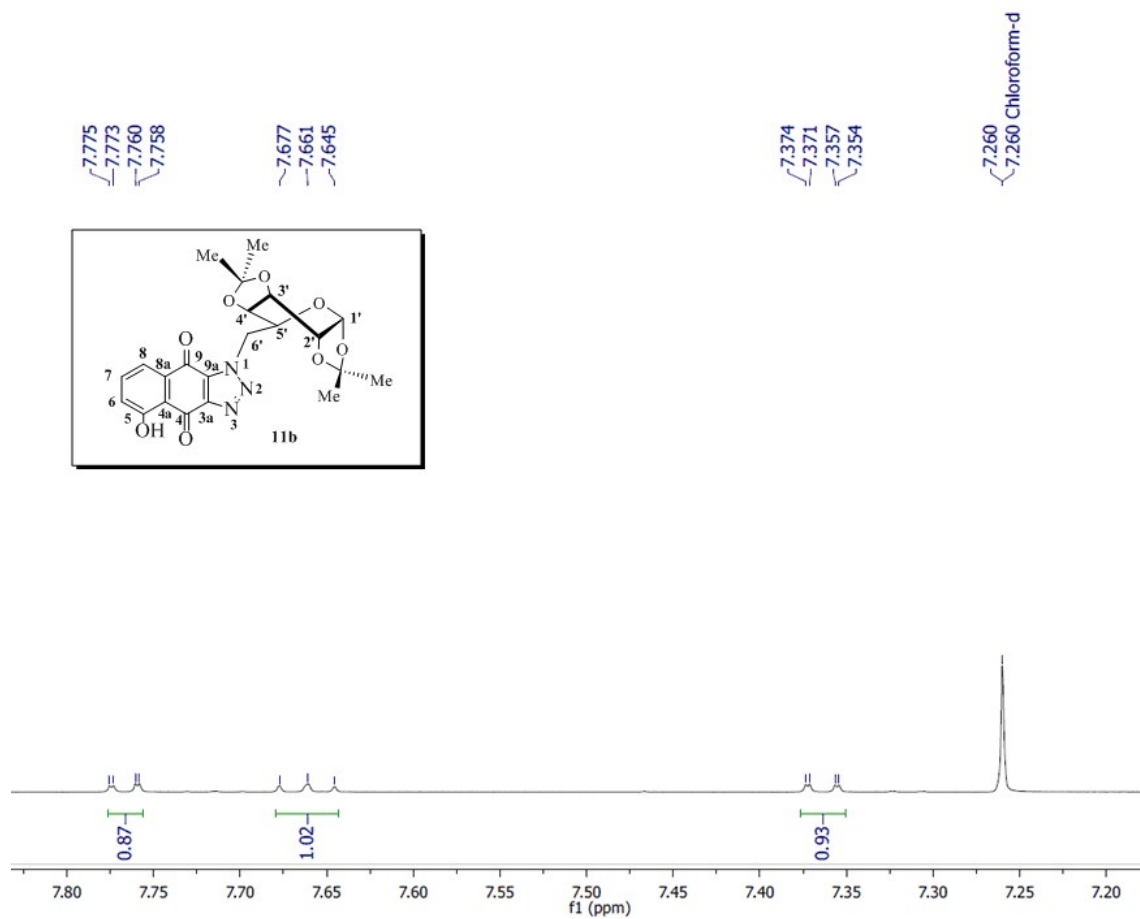

Expansion of the  $^1\text{H}$  NMR spectrum of derivative **11b** (CDCl<sub>3</sub>, 300 MHz).

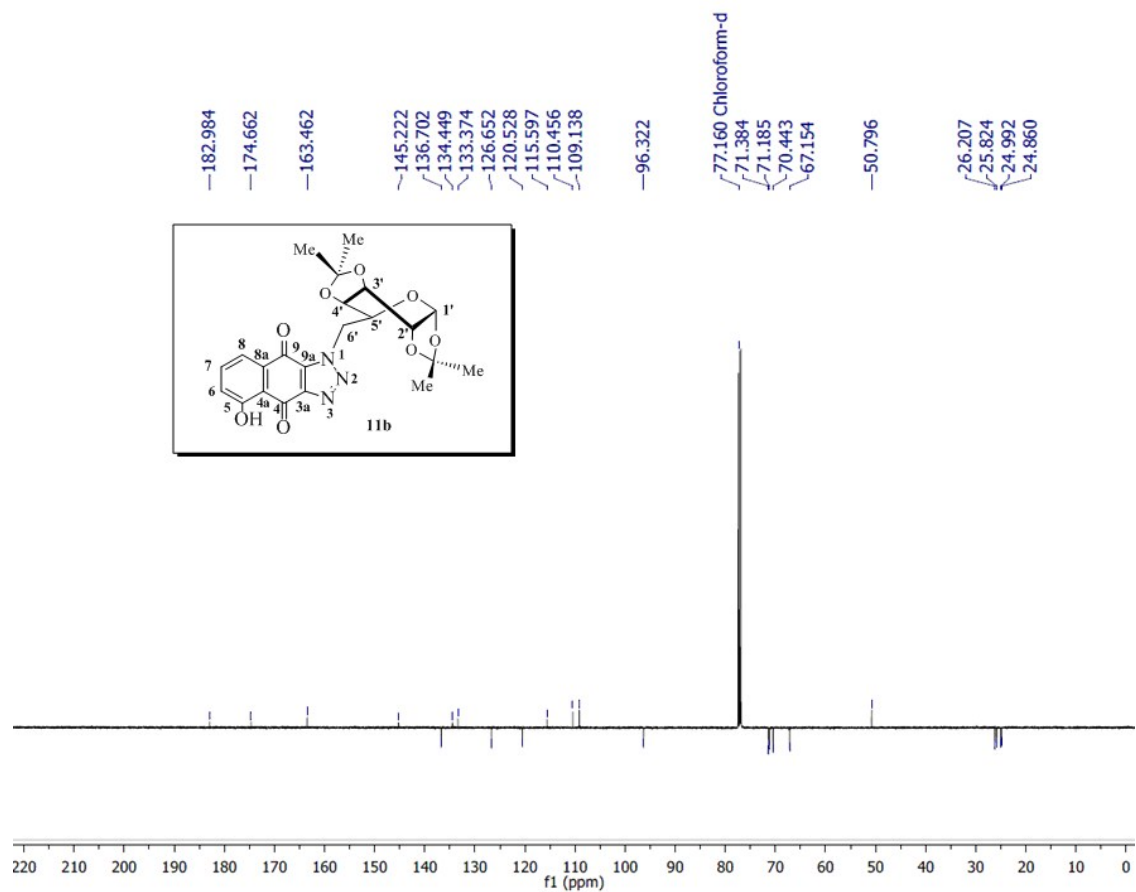

$^{13}\text{C}$  / APT NMR spectrum of derivative **11b** ( $\text{CDCl}_3$ , 75 MHz).

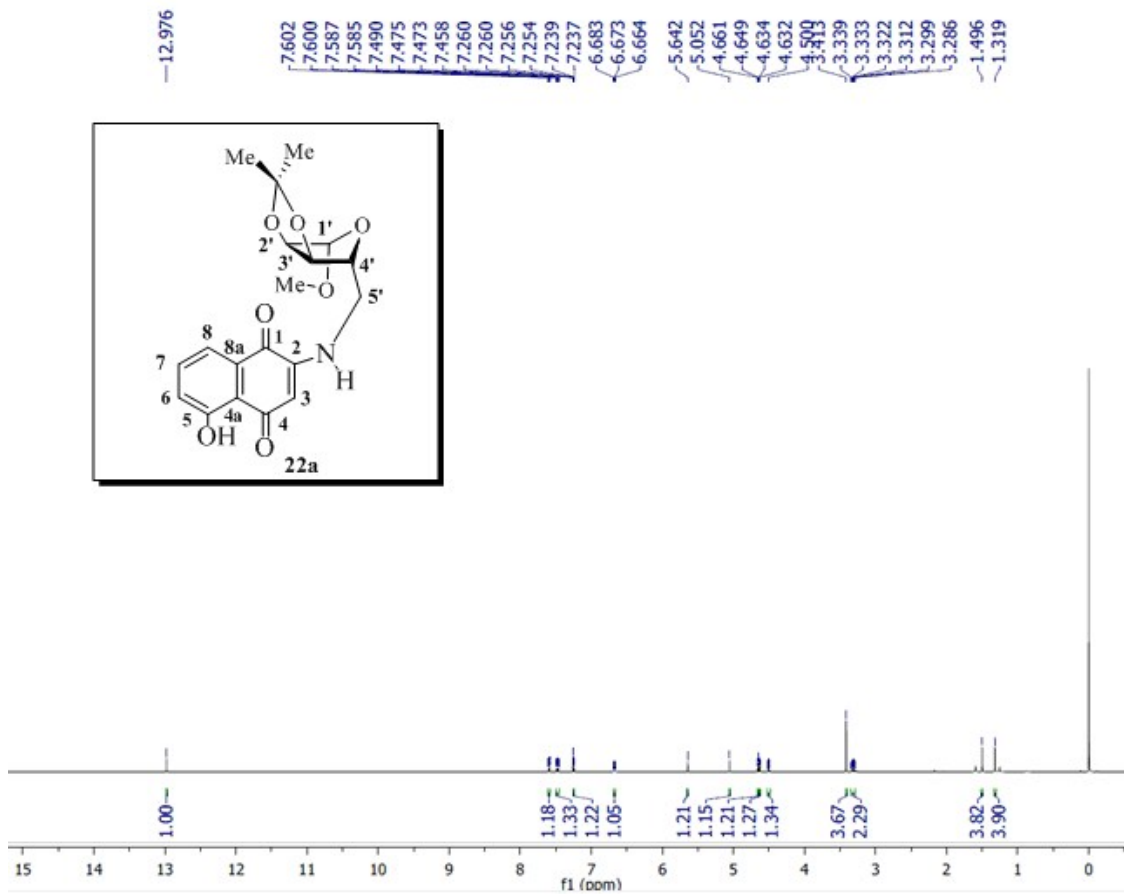

<sup>1</sup>H NMR spectrum of derivative **22a** (CDCl<sub>3</sub>, 500 MHz).

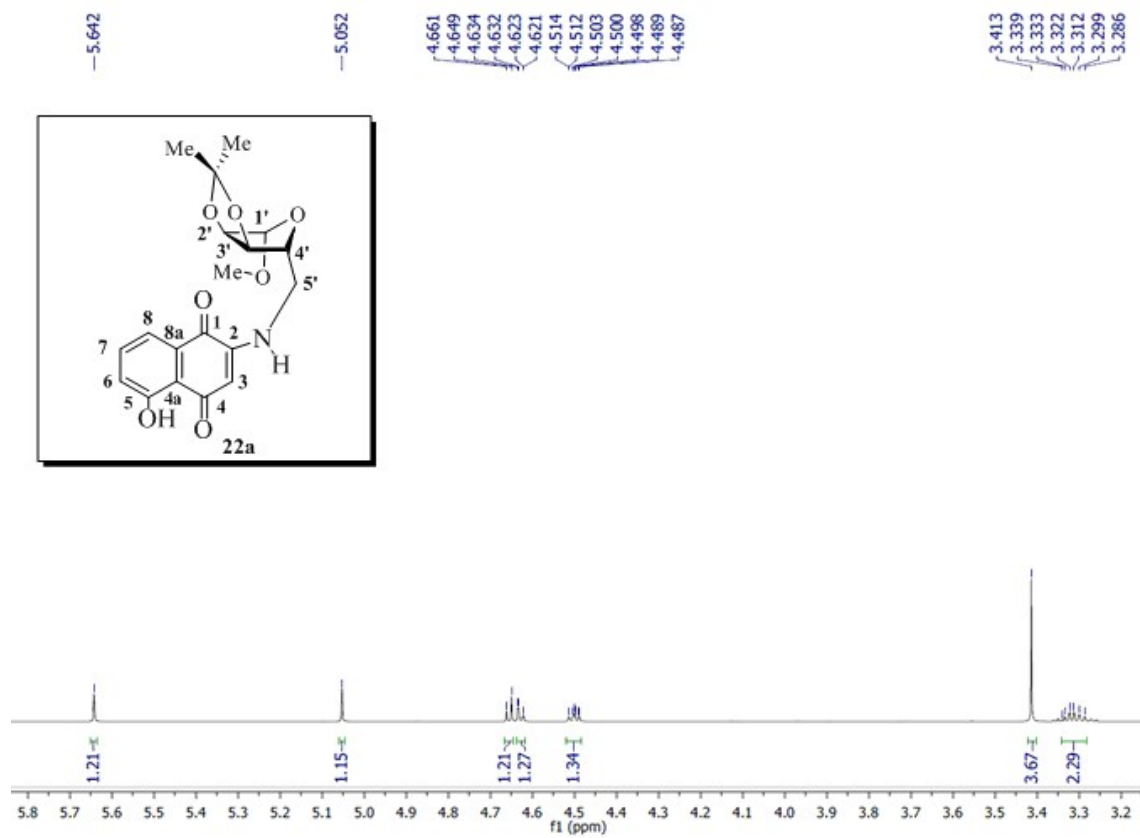

Expansion of the  $^1\text{H}$  NMR spectrum of derivative **22a** (CDCl<sub>3</sub>, 500 MHz).



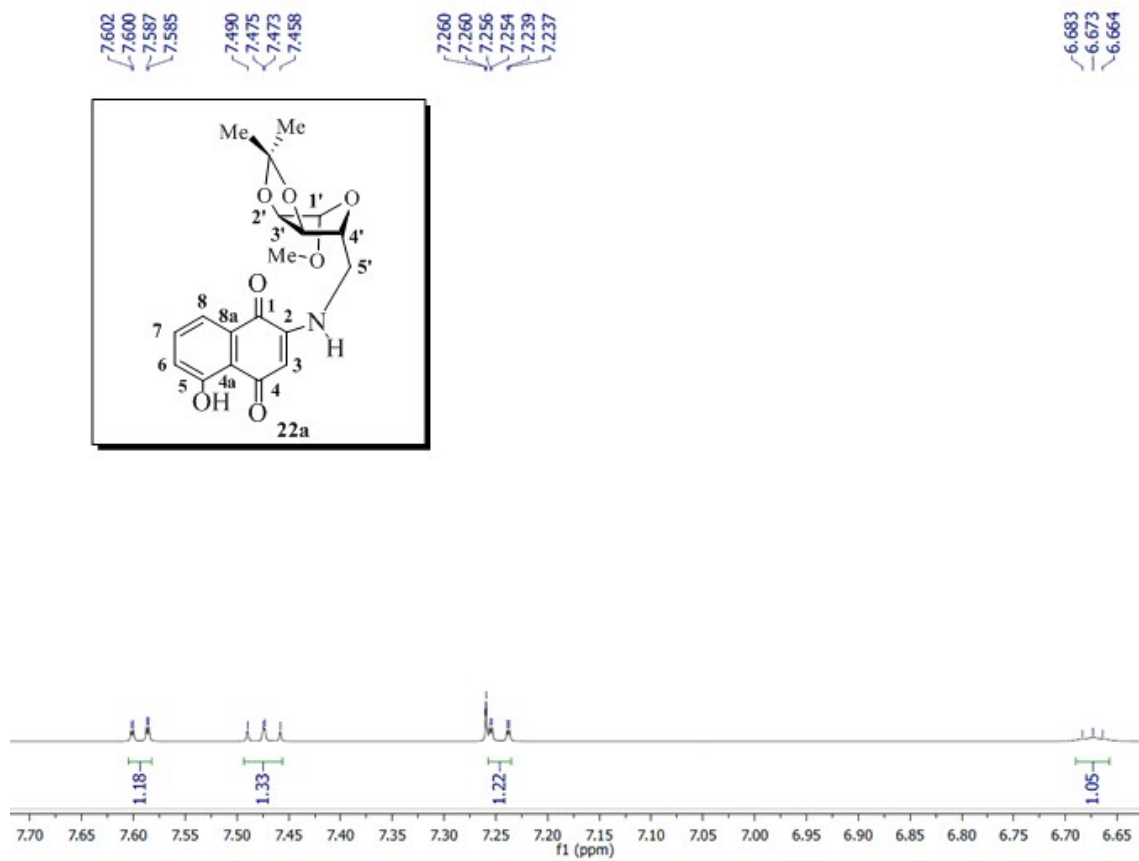

Expansion of the  $^1\text{H}$  NMR spectrum of derivative **22a** (CDCl<sub>3</sub>, 500 MHz).

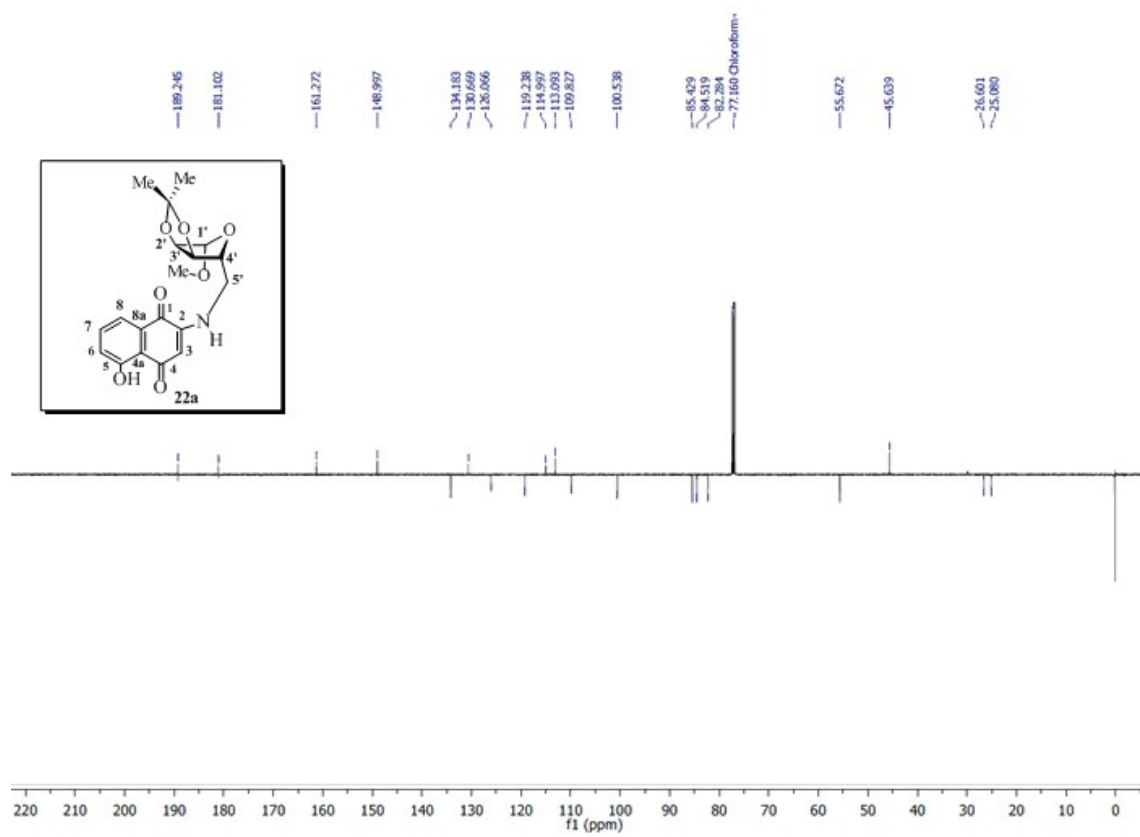

$^{13}\text{C}$  / APT NMR spectrum of derivative **22a** ( $\text{CDCl}_3$ , 125 MHz).

—13.051

7.601  
7.597  
7.576  
7.572  
7.487  
7.459  
7.434  
7.260  
7.250  
7.246  
7.222  
7.218  
6.560  
6.541  
5.671  
5.558  
5.541  
4.641  
4.633  
4.361  
4.353  
4.345  
4.337  
4.264  
4.258  
3.475  
3.456  
3.438  
1.518  
1.492  
1.370  
1.330

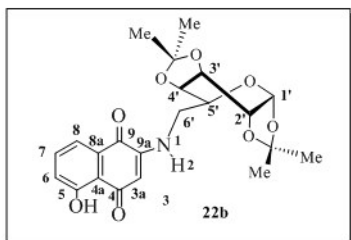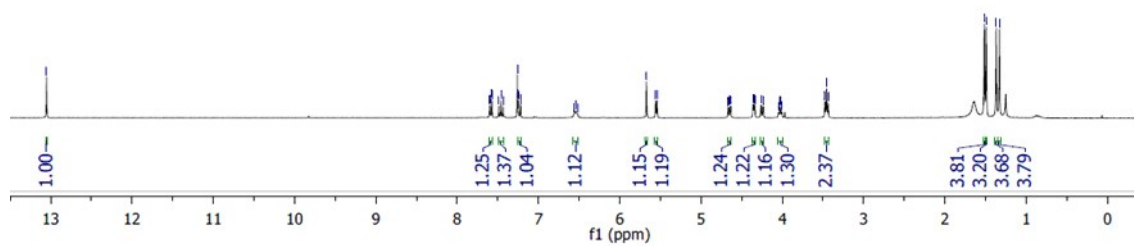

$^1\text{H}$  NMR spectrum of derivative **22b** ( $\text{CDCl}_3$ , 300 MHz).

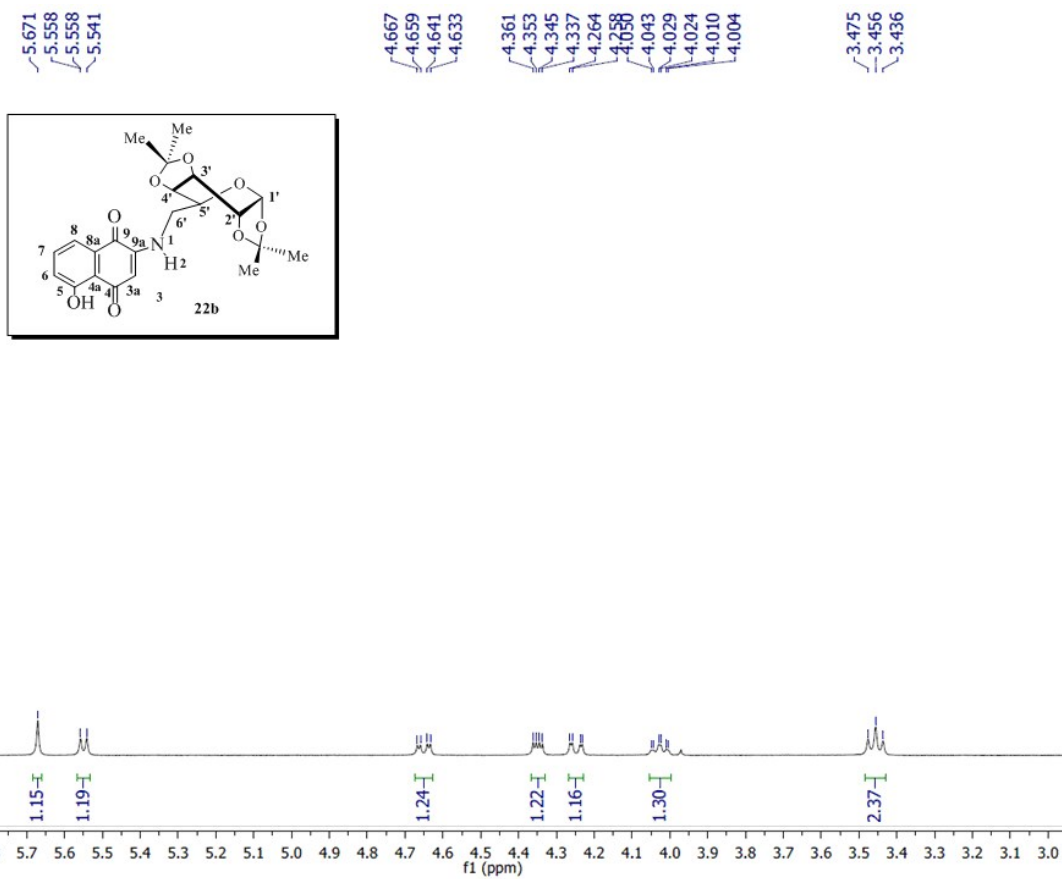

Expansion of the <sup>1</sup>H NMR spectrum of derivative **22b** (CDCl<sub>3</sub>, 300 MHz).

7.601  
7.597  
7.576  
7.572

7.487  
7.459  
7.434

7.260  
7.250  
7.246  
7.222  
7.218

6.560  
6.541  
6.520

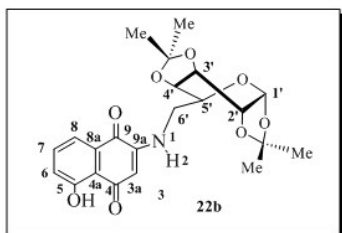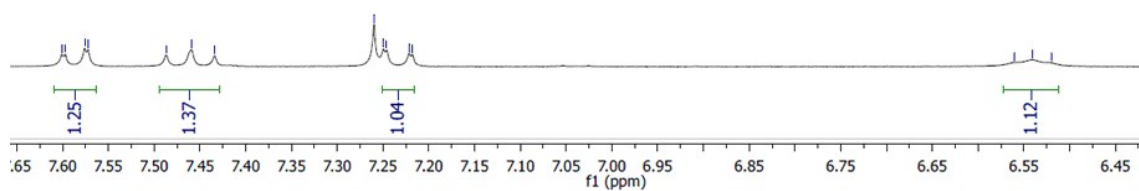

Expansion of the  $^1\text{H}$  NMR spectrum of derivative **22b** ( $\text{CDCl}_3$ , 300 MHz).
